# Supplementary material for: Manipulation of amorphous precursors to enhance zeolite nucleation
Source: Royal Society of Chemistry journal article supplement (doi:10.1039/d1fd00096a), 2021-12-20
Supplement: d1fd00096a1.pdf [file d1fd00096a1.pdf]

## Electronic Supplementary Information for

### Manipulation of Amorphous Precursors to Enhance Zeolite Nucleation

*Deependra Parmar<sup>1</sup>, Zhiyin Niu<sup>1</sup>, Yu Liang<sup>1</sup>, Heng Dai<sup>1</sup>, and Jeffrey D. Rimer<sup>1\*</sup>*

<sup>1</sup> Department of Chemical and Biomolecular Engineering, University of Houston, 4726 Calhoun Road, Houston, Texas 77204, USA

\* Correspondence sent to: [jrimer@central.uh.edu](mailto:jrimer@central.uh.edu)

| <b><u>Table of Contents</u></b> | <b><u>Page</u></b> |
|---------------------------------|--------------------|
| <b>Supporting Tables</b> .....  | <b>2</b>           |
| <b>Supporting Figures</b> ..... | <b>3</b>           |
| <b>References</b> .....         | <b>20</b>          |

#### **List of Tables and Figures**

**Table S1:** Elemental composition of alkali-treated fumed silica.

**Figure S1:** Effect of addition of NaBr on MOR and SSZ-13 syntheses.

**Figure S2:** Pictures showing aggregation behavior of FS and FS-a after hydrothermal treatment.

**Figure S3:** Analysis of mordenite (MOR) synthesis using FS-w as the silicon source.

**Figure S4:** Analysis of SSZ-13 (CHA) synthesis using FS-w as the silicon source.

**Figure S5:** Analysis of ZSM-5 (MFI) synthesis using FS-w as the silicon source.

**Figure S6:** Analysis of SSZ-13 (CHA) synthesis using FS and FS-a as the silicon sources.

**Figure S7:** SEM images of SSZ-13 (CHA) synthesis using FS and FS-a as the silicon sources.

**Figure S8:** Analysis of ZSM-5 (MFI) synthesis using FS and FS-a as the silicon sources.

**Figure S9:** Analysis of K-SSZ-13 synthesis using FS, FS-a, and FS with added KBr.

**Figure S10:** Effect of PDDA concentration on MOR and ZSM-5 synthesis.

**Figure S11:** Analysis of mordenite (MOR) synthesis using PDDA as growth modifier.

**Figure S12:** Analysis of ZSM-5 (MFI) synthesis using PDDA as growth modifier.

**Figure S13:** Analysis of SSZ-13 (CHA) synthesis using PDDA as growth modifier.

**Figure S14:** Analysis of ZSM-5 (MFI) using FS-a as silica source and PDDA as growth modifier.

**Figure S15:** OIM study showing aggregation of SiO<sub>2</sub> in presence of TPAOH and PDDA.

**Figure S16:** Analysis of mordenite (MOR) using FS-a as silica source and PDDA as growth modifier.

**Figure S17:** Analysis of SSZ-13 (CHA) using FS-a as silica source and PDDA as growth modifier.

**Figure S18:** Induction times of MOR, SSZ-13 and ZSM-5 with different treatments.

## Supporting Tables

**Table S1.** Elemental composition of alkali-treated fumed silica (FS-a).

| Composition <sup>a</sup> | Amount (wt%) <sup>b</sup> |
|--------------------------|---------------------------|
| SiO <sub>2</sub>         | 86                        |
| Na                       | 4                         |
| Br                       | 10                        |

a Obtained after soaking as received fumed silica in 2M NaBr solution for one week at room temperature;

b. Composition obtained by energy dispersive x-ray spectroscopy.

## Supporting Figures

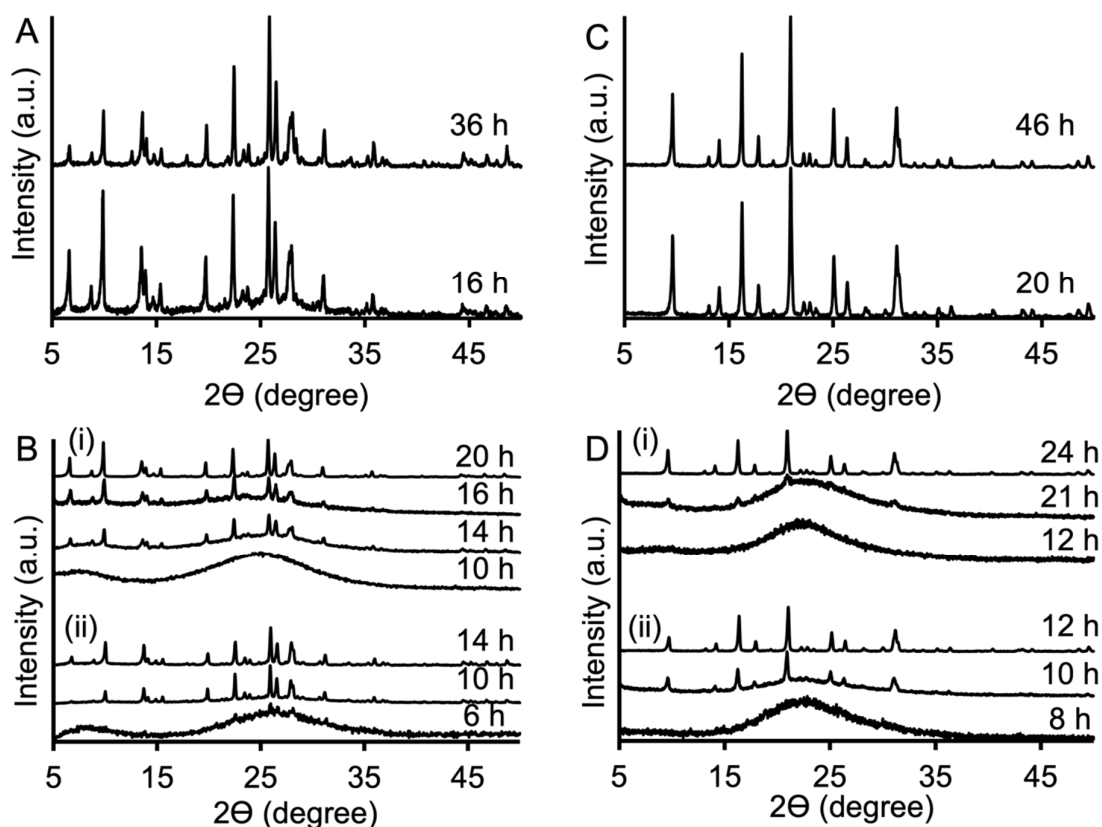

**Fig. S1.** Powder XRD patterns of solids extracted from (A, B) mordenite (MOR) and (C, D) SSZ-13 (CHA) synthesis prepared with (A, C) as received fumed silica (FS) and (B, D) colloidal silica (CS) at various times of hydrothermal treatment (labelled). (A and C) Syntheses were carried out with the addition of NaBr (equivalent to quantity in modified fumed silica, FS-a). (B and D) For studies with CS as the silicon source, syntheses were carried out without (i) and with (ii) the addition of NaBr. Hydrothermal synthesis was performed at 165 °C for mordenite and 180 °C for SSZ-13.

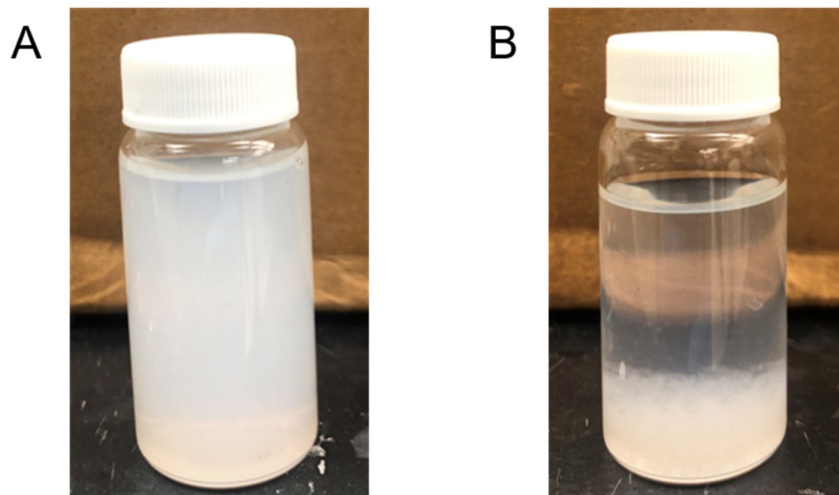

**Fig. S2.** The solutions used for DLS measurements with molar composition 1 SiO<sub>2</sub>: 1 NaOH: 350 H<sub>2</sub>O after 4 h of hydrothermal treatment at 180 °C. (A) Solution made from as received fumed silica (FS) showing no phase separation or precipitation. (B) Solution obtained from alkali-infused fumed silica (FS-a) showing the precipitation of amorphous silica precursors. Prior to DLS analysis, all turbid solutions were filtered using a membrane (1 mm pore diameter) to prepare clear solutions.

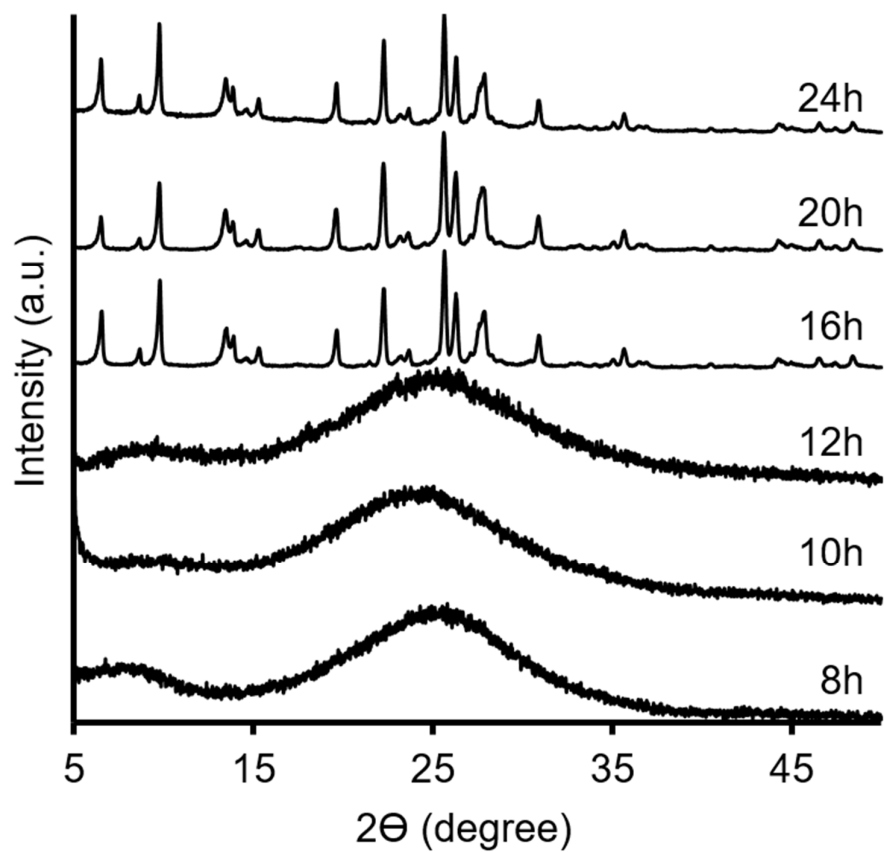

**Fig. S3.** Time-elapsing powder XRD patterns of solids extracted from a mordenite (MOR) synthesis prepared with water-treated fumed silica (FS-w) at various times of hydrothermal treatment (8, 10, 12, 16, 20, and 24 h) at 165 °C.

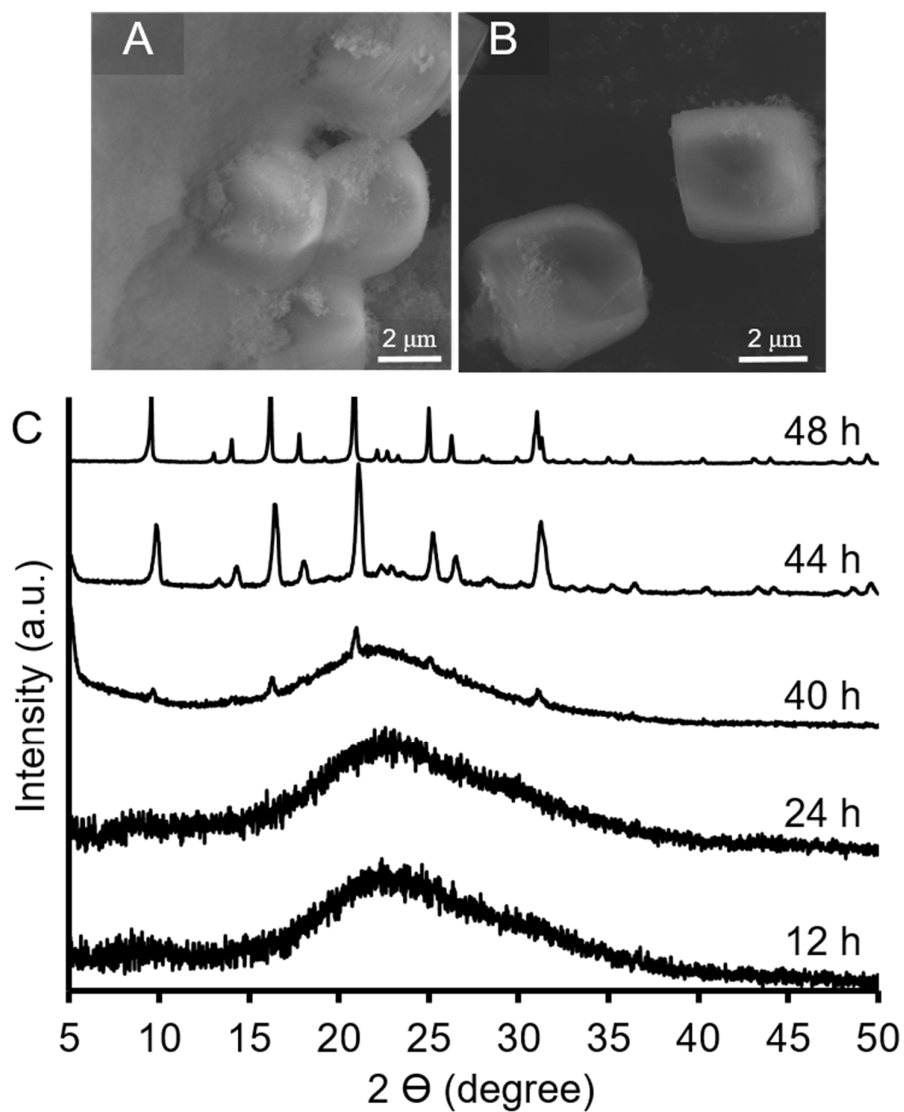

**Fig. S4.** Analysis of a SSZ-13 (CHA) synthesis using FS-w as the silicon source. (A and B) Scanning electron micrographs of (A) amorphous precursors and (B) fully crystalline product. (C) Time-elapsd powder XRD patterns of solids extracted from Patterns are shown for samples extracted at various times of hydrothermal treatment (12, 24, 40, 44, and 48 h) at 180 °C.

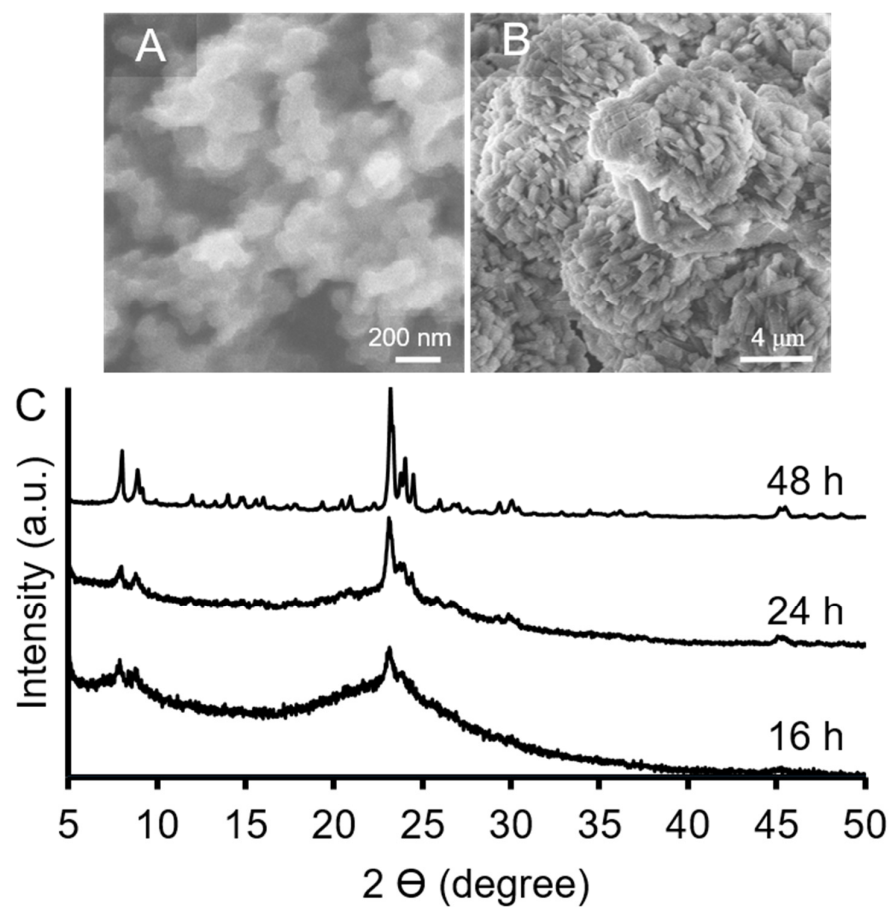

**Fig. S5.** Analysis of a ZSM-5 (MFI) synthesis using FS-w as the silicon source. (A and B) Scanning electron micrographs of (A) amorphous precursors and (B) fully crystalline product. (C) Time-elased powder XRD patterns of solids extracted from Patterns are shown for samples extracted at various times of hydrothermal treatment (16, 24, and 48 h) at 170 °C.

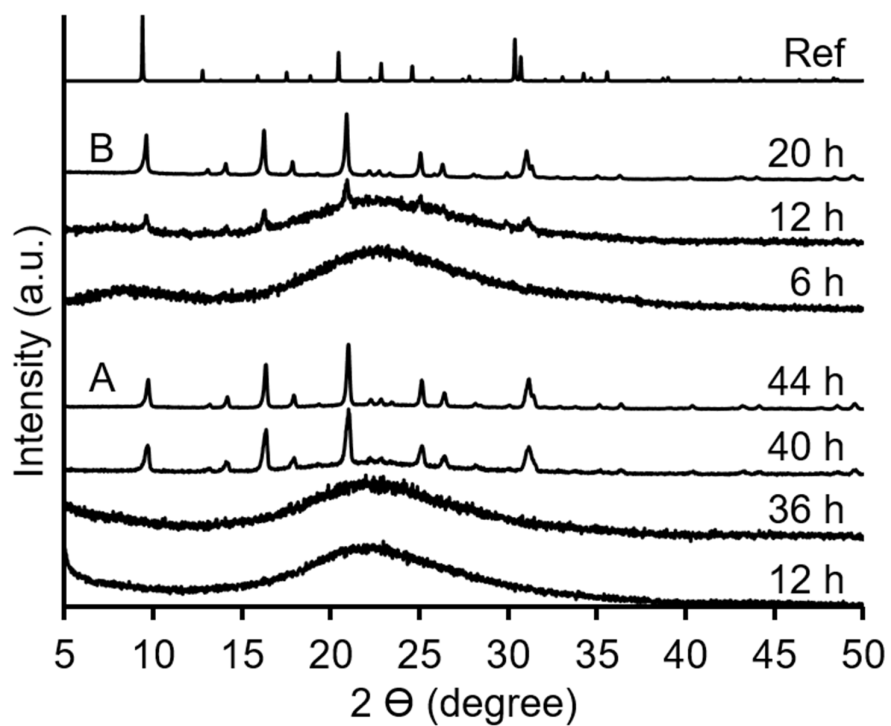

**Fig. S6.** Time-elapsing powder XRD patterns of solids extracted from a SSZ-13 (CHA) synthesis prepared using (A) as received fumed silica (FS) and (B) alkali-treated fumed silica (FS-a) at various hydrothermal treatment times (labeled) at 180 °C. Reference XRD pattern for SSZ-13 is shown at the top.<sup>1</sup>



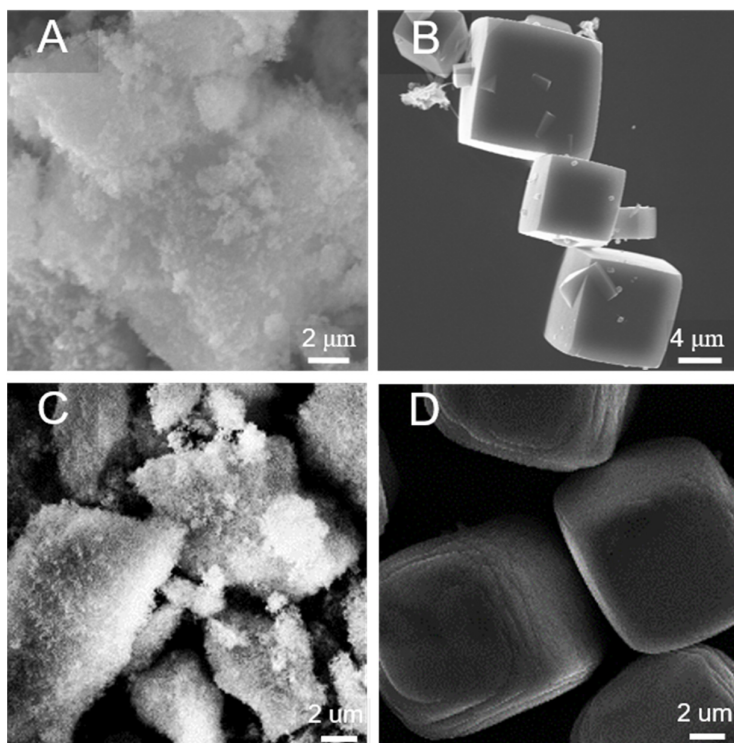

**Fig. S7.** Scanning electron micrographs of solids extracted from a SSZ-13 (CHA) synthesis prepared with (A,B) FS and (C,D) FS-a as the silicon sources. Images show solids prior to nucleation (A, C) and once fully crystalline (B, D). Growth mixtures were heated at 180 °C and solids were removed at the following times: (A) 12 h, (B) 44 h, (C) 6 h, and (D) 20 h.

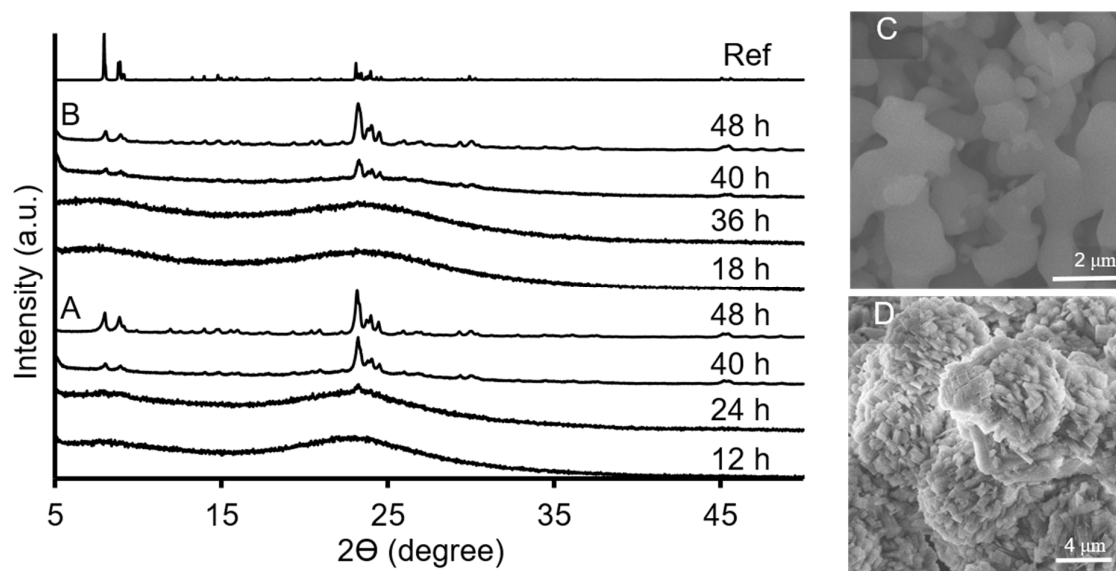

**Fig. S8.** Time-elapsing powder XRD patterns of solids extracted from a ZSM-5 (MFI) synthesis prepared using (A) as received fumed silica (FS) and (B) alkali-treated fumed silica (FS-a) at various hydrothermal treatment times (labeled) at 170 °C. Reference XRD pattern for MFI (Ref) is shown at the top.<sup>1</sup> (C and D) Scanning electron micrographs of (C) amorphous precursors and (D) fully crystalline product for ZSM-5 synthesized using FS-a.

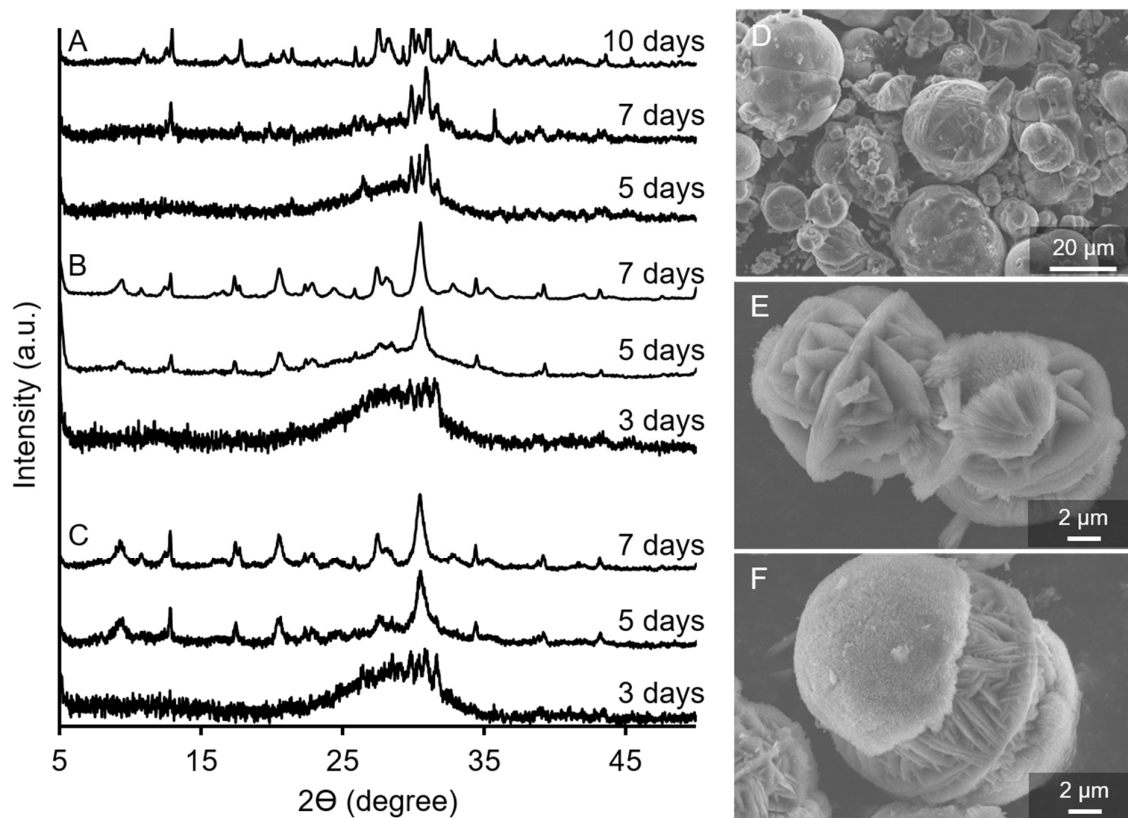

**Fig. S9.** (A-C) Time-elapsing powder XRD patterns of solids extracted from a K-SSZ-13 (CHA) synthesis prepared using (A) as received fumed silica (FS), (B) alkali-treated fumed silica using KBr (FS-a) and (C) fumed silica (FS) with the addition of KBr (equivalent to quantity in modified fumed silica, FS-a) at various hydrothermal treatment times (labeled) at 100 °C. (D-F) Scanning electron micrographs of fully crystalline materials synthesized using fumed silica (D), alkali-treated fumed silica (E) and fumed silica with addition of KBr (F).

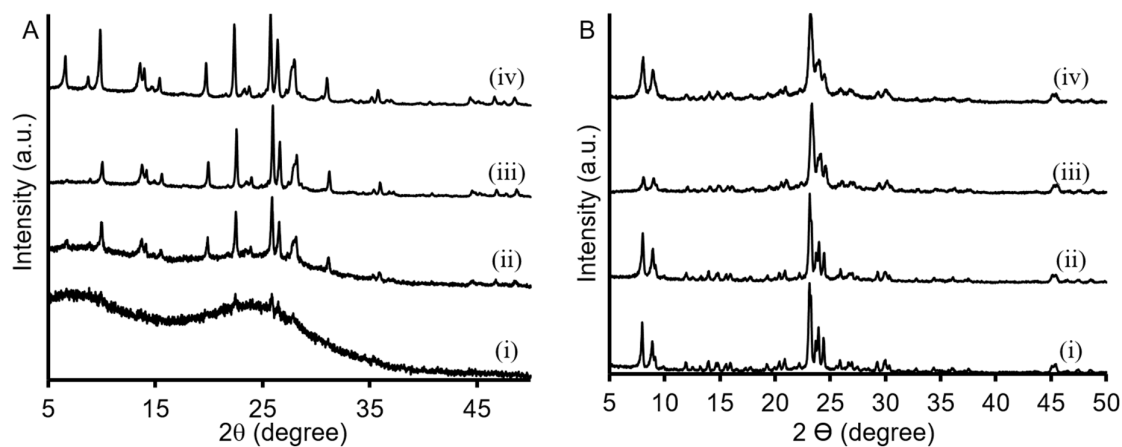

**Fig. S10.** Powder XRD patterns of solids extracted from (A) mordenite and (B) ZSM-5 (MFI) synthesis prepared using fumed silica (FS) with PDDA/SiO<sub>2</sub> molar ratios of (i)  $2.4 \times 10^{-5}$ , (ii)  $1.8 \times 10^{-5}$ , (iii)  $1.2 \times 10^{-5}$ , and (iv)  $6.0 \times 10^{-6}$ . Hydrothermal synthesis was done for 24 h at 165 °C for mordenite and for 20 h at 180 °C for ZSM-5. The optimum PDDA/SiO<sub>2</sub> ratios resulting in the fastest zeolite crystallization time are  $6.0 \times 10^{-6}$  and  $2.4 \times 10^{-5}$  for mordenite and ZSM-5 (based on diffraction peaks intensity) synthesis, respectively.

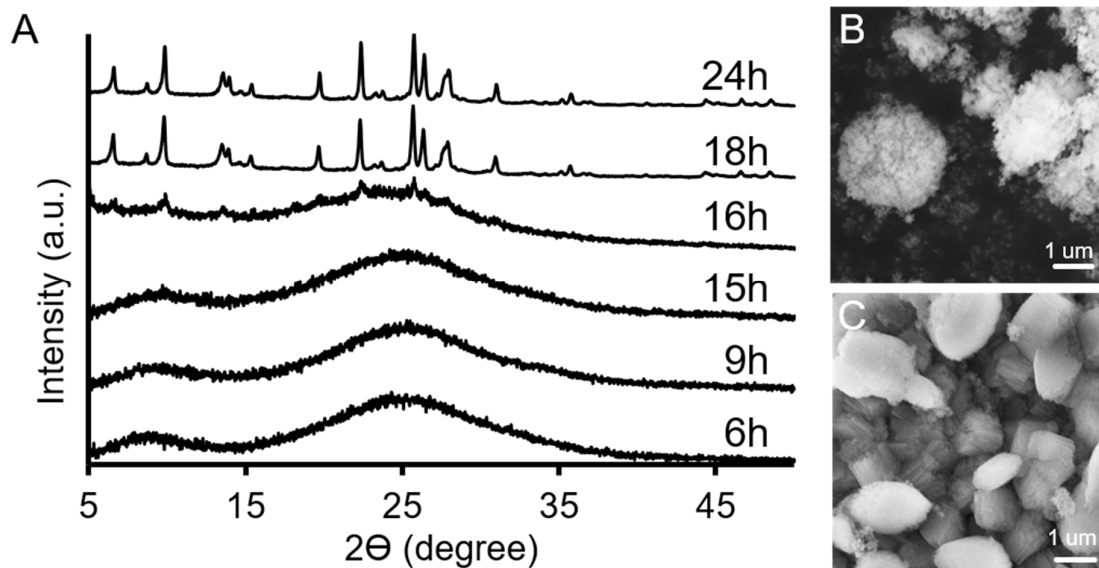

**Fig. S11.** (A) Time-elapsing powder XRD patterns of solids extracted from a mordenite (MOR) synthesis prepared using FS as the silicon source and PDDA with PDDA/SiO<sub>2</sub> molar ratio of  $6.0 \times 10^{-6}$  at various times of hydrothermal treatment (6, 9, 15, 18, and 24 h) at 165 °C. (B and C) Scanning electron micrographs of solids extracted after (B) 6 h and (C) 18 h of hydrothermal treatment.

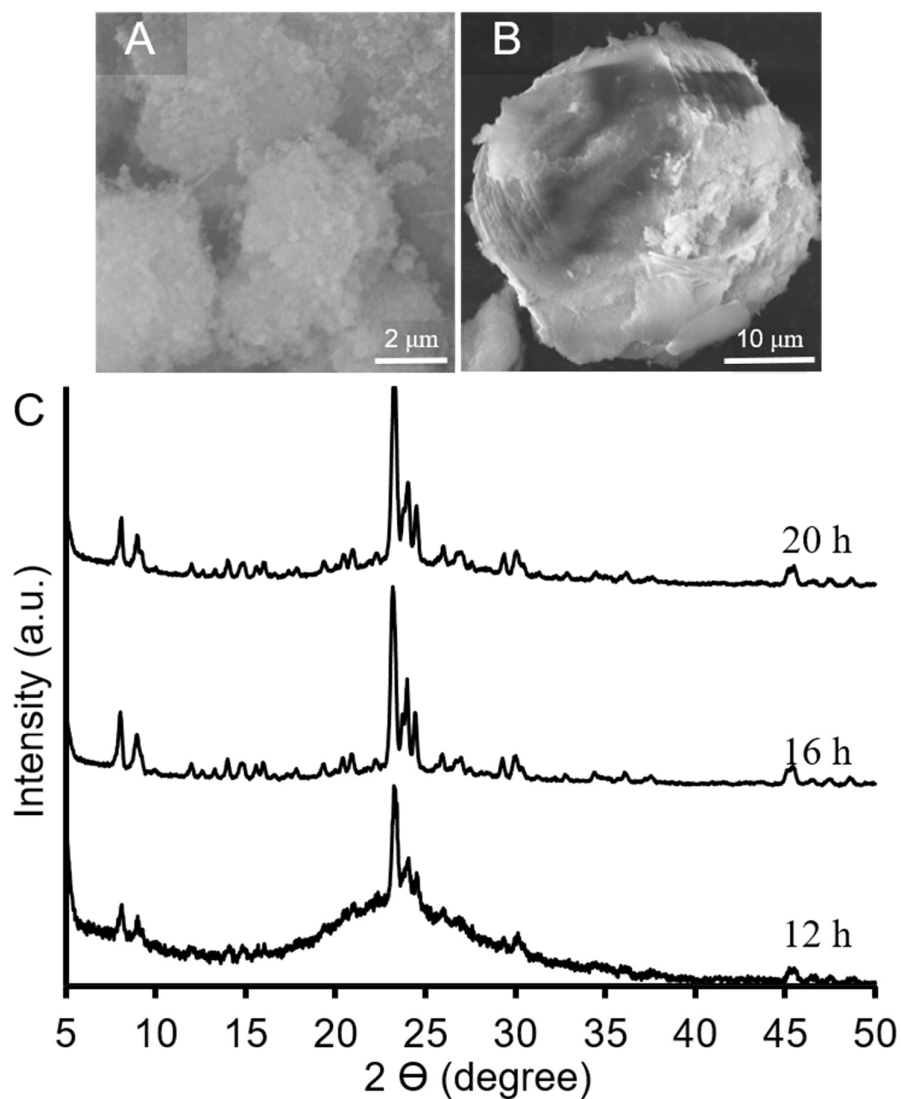

**Fig. S12.** Analysis of a ZSM-5 (MFI) synthesis using FS as the silicon source and PDDA with PDDA/SiO<sub>2</sub> molar ratios of  $2.4 \times 10^{-5}$ . (A and B) Scanning electron micrographs of (A) amorphous precursors and (B) fully crystalline product. (C) Time-elapsd powder XRD patterns of solids extracted from Patterns are shown for samples extracted at various times of hydrothermal treatment (12, 16, and 20 h) at 170 °C.

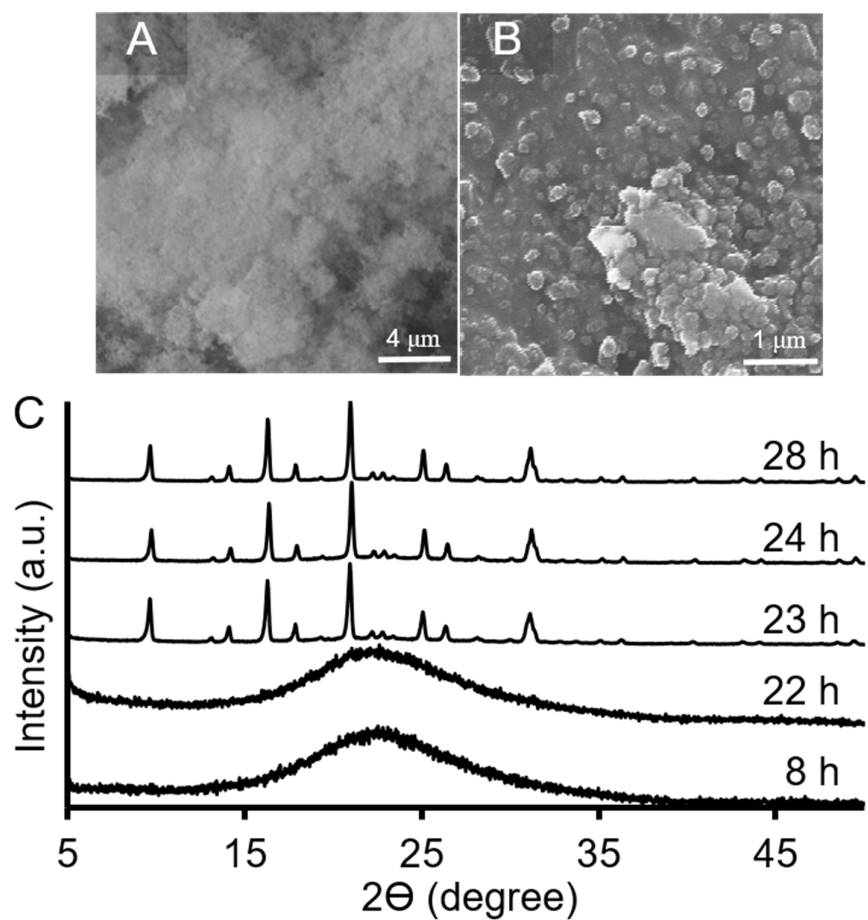

**Fig. S13.** Analysis of a SSZ-13 (CHA) synthesis using FS as the silicon source and PDDA with PDDA/SiO<sub>2</sub> molar ratios of  $1.2 \times 10^{-5}$ . (A and B) Scanning electron micrographs of (A) amorphous precursors and (B) fully crystalline product. (C) Time-elapsed powder XRD patterns of solids extracted from Patterns are shown for samples extracted at various times of hydrothermal treatment (8, 22, 24, and 28 h) at 180 °C.

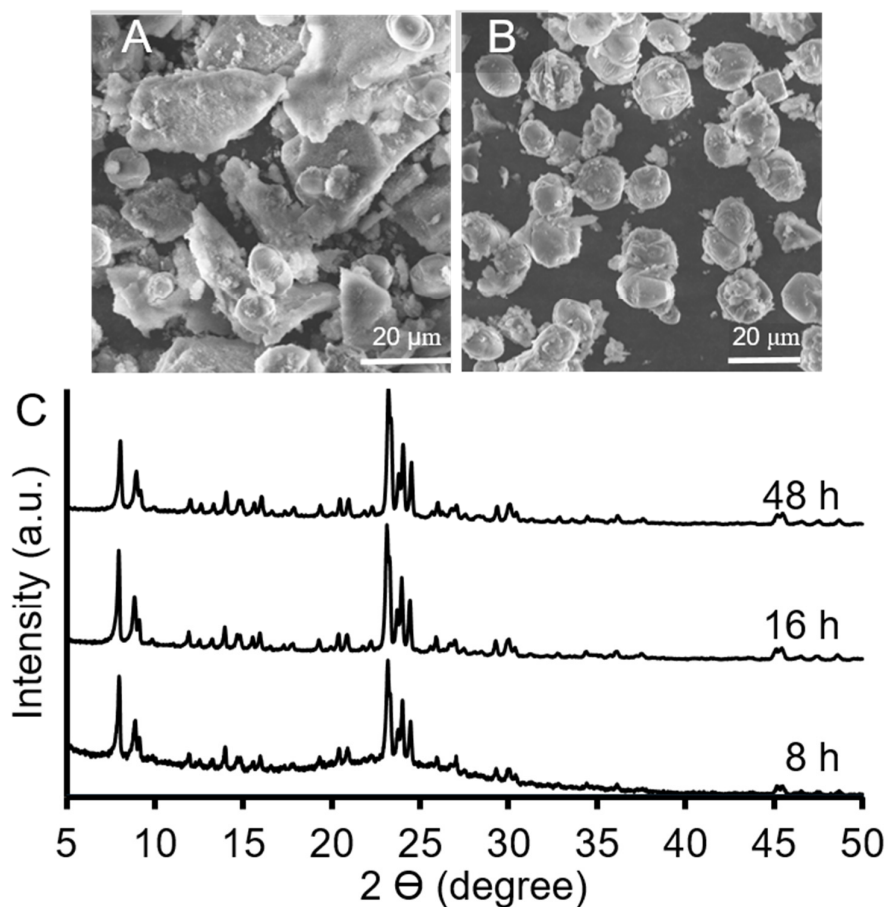

**Fig. S14.** Analysis of a ZSM-5 (MFI) synthesis using FS-a as the silicon source and PDDA with PDDA/SiO<sub>2</sub> molar ratios of  $2.4 \times 10^{-5}$ . (A and B) Scanning electron micrographs of (A) amorphous precursors and (B) fully crystalline product. (C) Time-elapsed powder XRD patterns of solids extracted from Patterns are shown for samples extracted at various times of hydrothermal treatment (8, 16, and 48 h) at 170 °C.



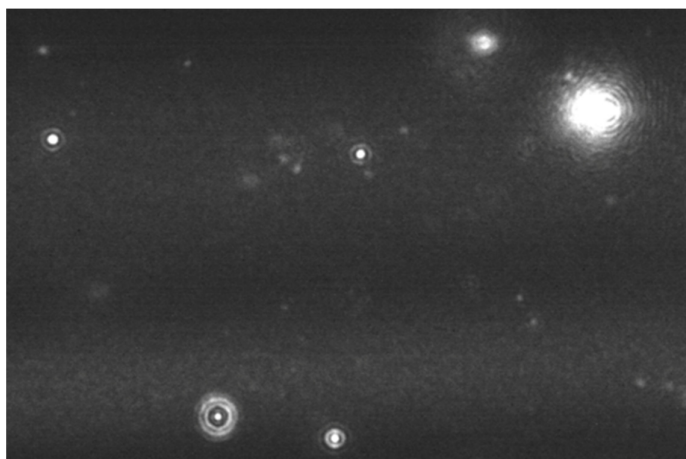

**Fig. S15.** OIM studies in clear solutions prepared from soluble silica source (sodium silicate) at a molar composition of 1  $\text{Na}_2\text{SiO}_3$ : 1760  $\text{H}_2\text{O}$ : 0.1 TPAOH with 0.05 wt% PDDA after 30 min.

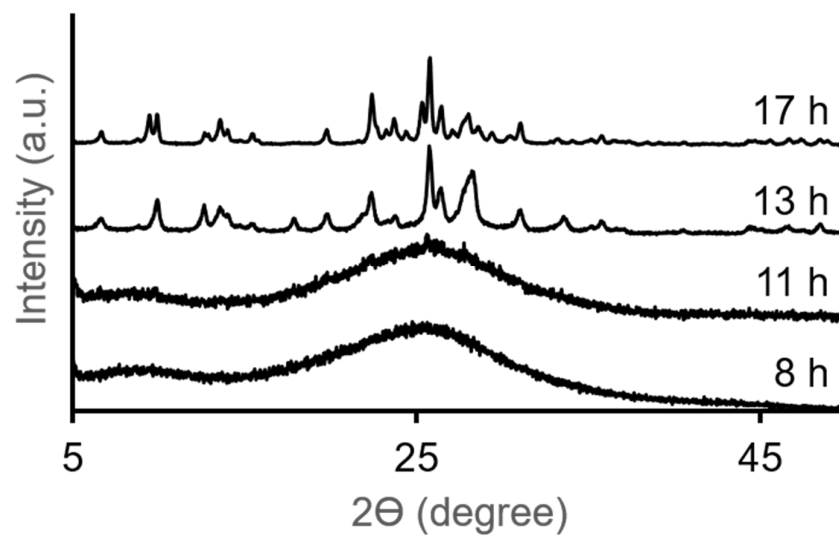

**Fig. S16.** Analysis of a mordenite (MOR) synthesis using FS-a as the silicon source and PDDA with PDDA/SiO<sub>2</sub> molar ratios of  $6.0 \times 10^{-6}$ . Time-elapsed powder XRD patterns of solids extracted from Patterns are shown for samples extracted at various times of hydrothermal treatment (8, 11, 13, and 17 h) at 165 °C.

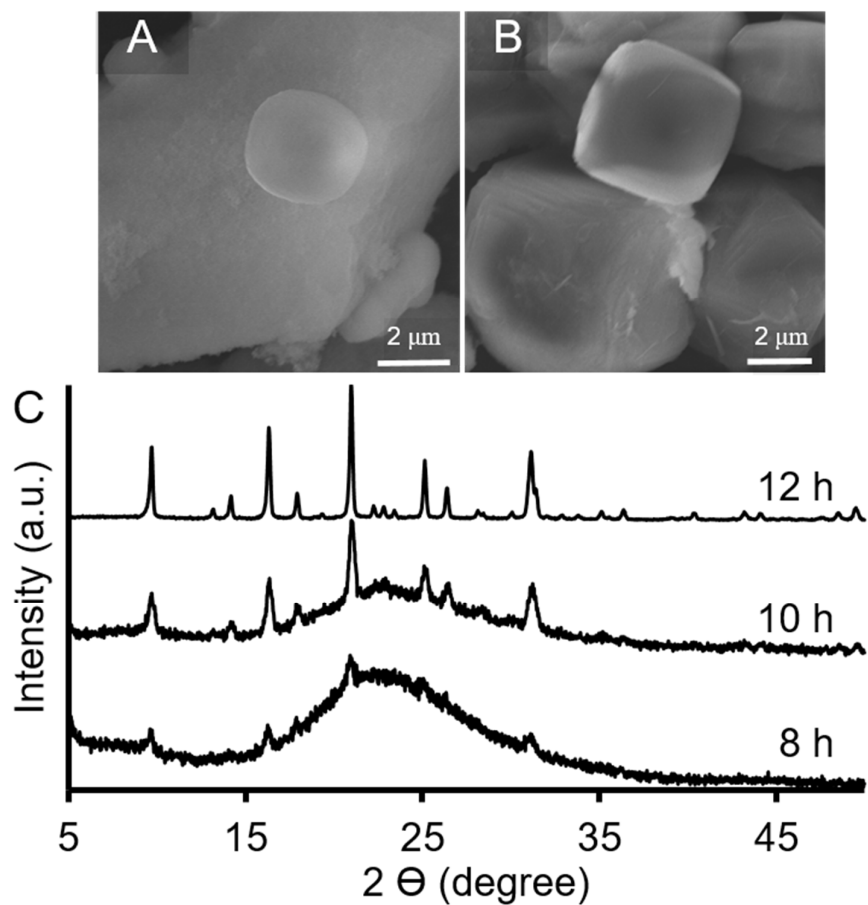

**Fig. S17.** Analysis of a SSZ-13 (CHA) synthesis using FS-a as the silicon source and PDDA with PDDA/SiO<sub>2</sub> molar ratios of  $1.2 \times 10^{-5}$ . (A and B) Scanning electron micrographs of (A) amorphous precursors and (B) fully crystalline product. (C) Time-elapsed powder XRD patterns of solids extracted from Patterns are shown for samples extracted at various times of hydrothermal treatment (8, 10, and 12 h) at 180 °C.

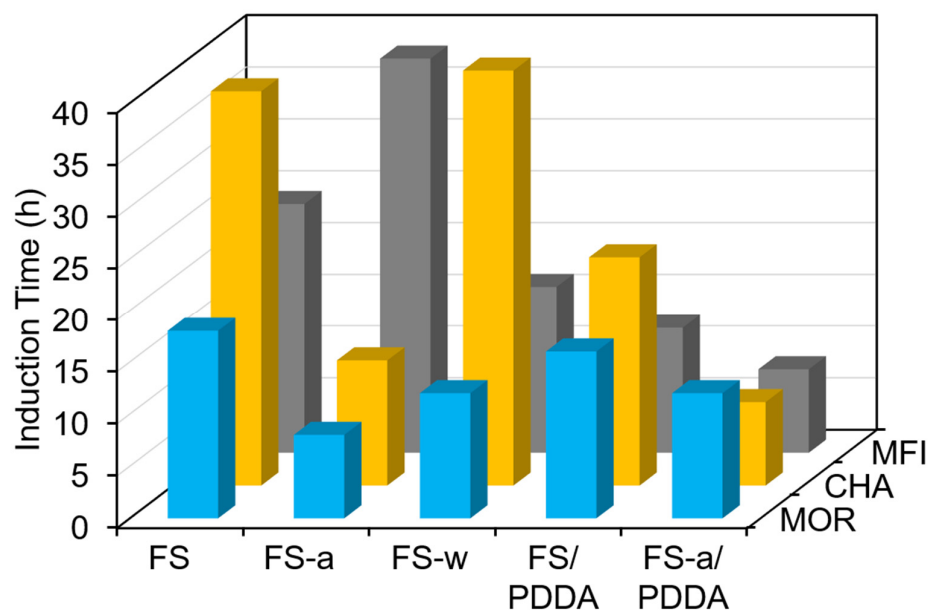

**Fig. S18.** Three dimensional plot of zeolite induction times for all three structures (MOR, CHA, MFI) for the five synthesis conditions tested: FS, FS-a, FS-w, FS/PDDA, and FS-a/PDDA. The induction times (i.e. first appearance of Bragg peaks in powder XRD patterns) listed here are evaluated from powder XRD patterns of solids extracted at periodic synthesis times.

## References

- 1 C. Baerlocher and L. McCusker, Database of Zeolite Structures: <http://www.iza-structure.org/databases>. (2013).
